# Supplementary material for: A mycobacterial effector promotes ferroptosis-dependent pathogenicity and dissemination
Source: PubMed Central journal article supplement (PMC10023711; doi:10.1038/s41467-023-37148-x), 2023-03-17
Supplement: 41467_2023_37148_MOESM1_ESM.pdf [file 41467_2023_37148_MOESM1_ESM.pdf]

## **Supplementary Information**

### **A mycobacterial effector promotes ferroptosis-dependent pathogenicity and dissemination**

Lihua Qiang, Yong Zhang, Zehui Lei, Zhe Lu, Shasha Tan, Pupu Ge, Qiyao Chai, Mengyuan Zhao, Xinwen Zhang, Bingxi Li, Yu Pang, Lingqiang Zhang, Cui Hua Liu, Jing Wang

**The PDF file includes:**

**Supplementary Figures 1–8**

# Supplementary Figure 1

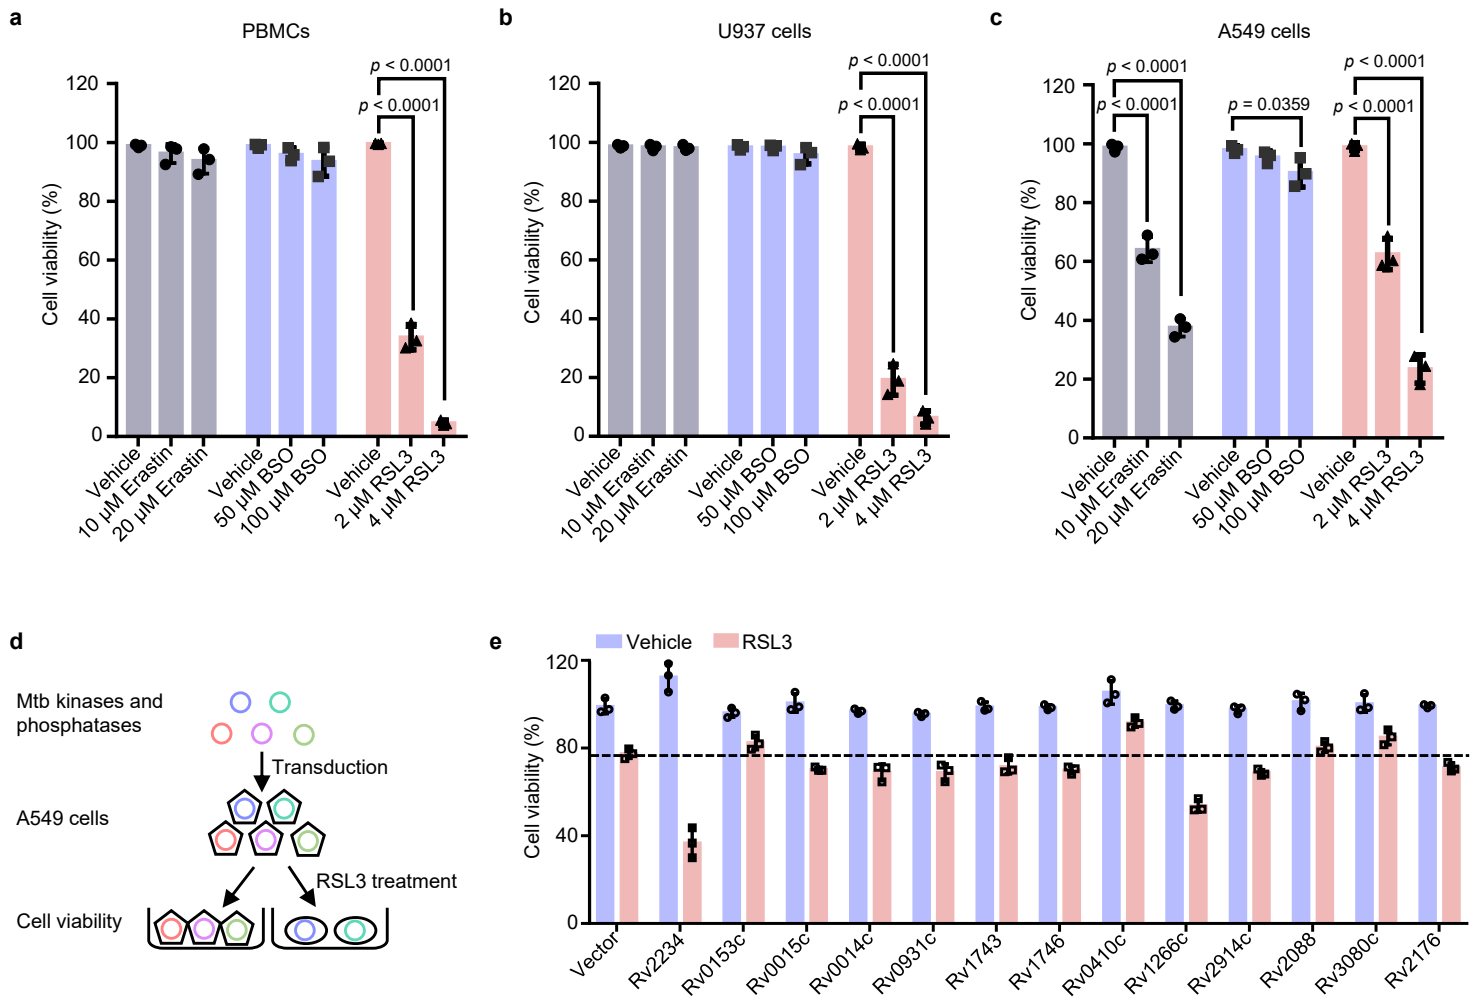

**Supplementary Figure 1. Mtb PtpA induces ferroptosis of host cells.** **a–c** Cell viability of PBMCs (**a**), U937 cells (**b**), and A549 cells (**c**) treated with vehicle, Erastin, BSO, or RSL3 for 24 h. **d** Schematic diagram of the procedure to screen Mtb pro-ferroptotic effector in secretory eukaryotic-like phosphatases and kinases. **e** Cell viability (relative to baseline) of A549 cells by Cell Counting Kit-8 (CCK-8) assay. A549 cells were transfected with empty vector or vectors encoding Mtb effector proteins, including secretory eukaryotic-like phosphatases and kinases, for 24 h. Cells were then treated with vehicle or 4  $\mu$ M RSL3 for 8 h. Error bars are means  $\pm$  SD of three groups. Statistical significance was determined using two-way ANOVA (Tukey's multiple comparisons test).

# Supplementary Figure 2

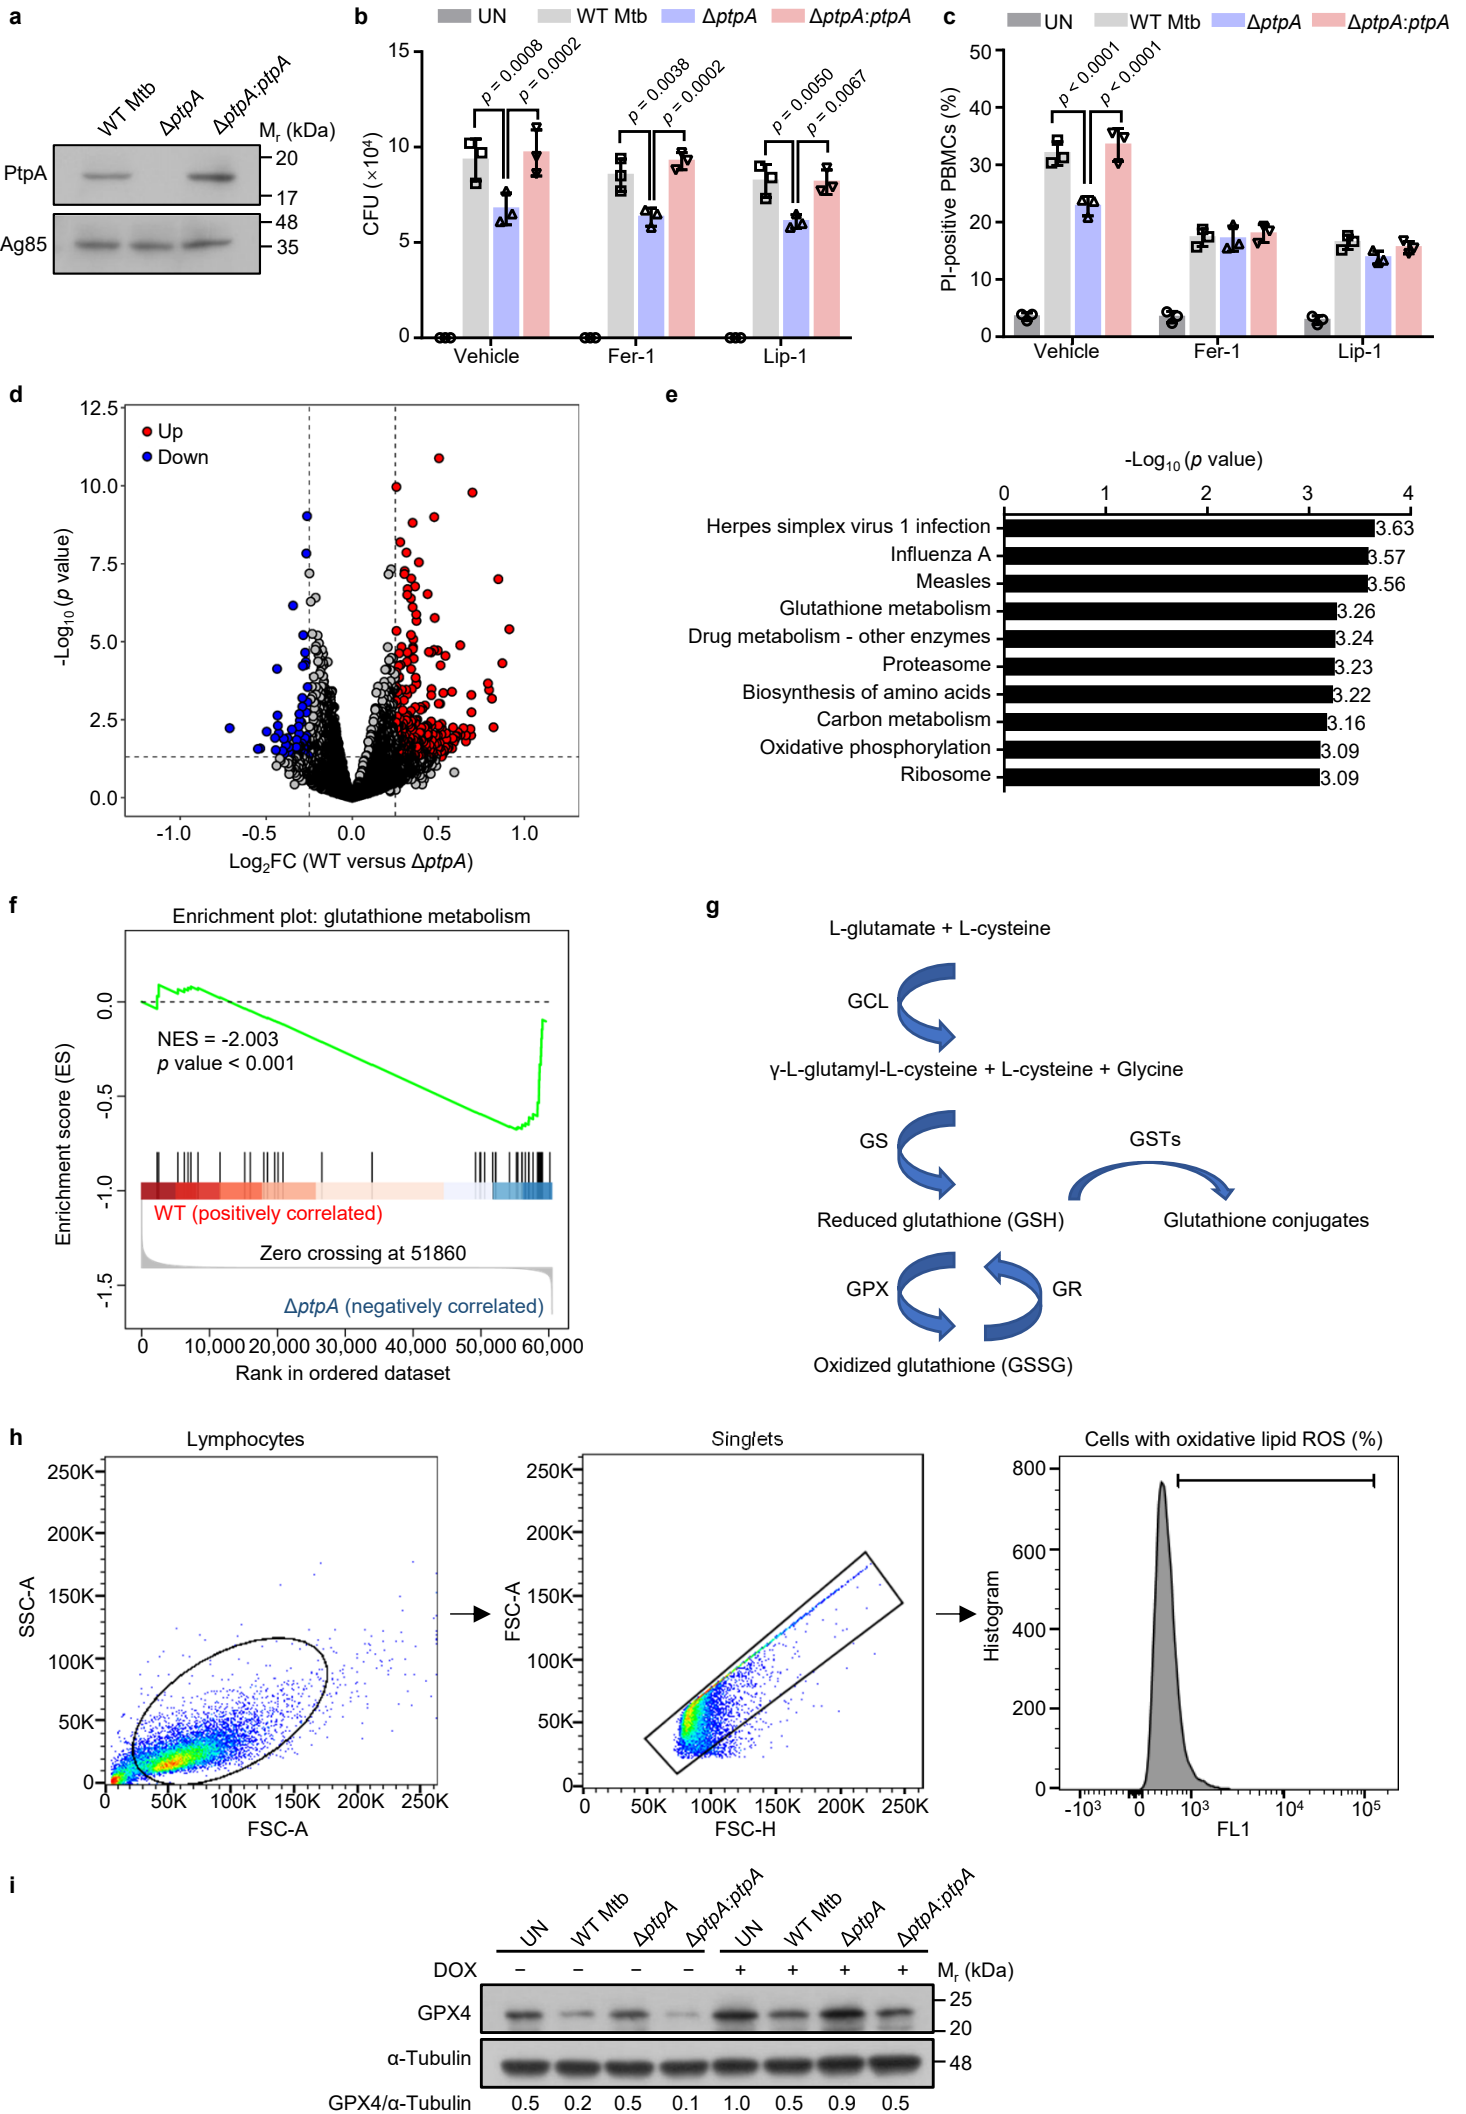

**Supplementary Figure 2. Genome-wide analysis links Mtb PtpA to glutathione metabolism-related biological processes.** **a** Immunoblot analysis of PtpA and Ag85 in WT Mtb, Mtb  $\Delta ptpA$ , and Mtb  $\Delta ptpA:ptpA$  strains. **b** Survival of Mtb strains in U937 cells. Cells were uninfected (UN) or infected with WT Mtb, Mtb  $\Delta ptpA$ , or Mtb  $\Delta ptpA:ptpA$  strain at an MOI of 10 for 24 h with the treatment of vehicle, 10  $\mu$ M Fer-1, or 10  $\mu$ M Lip-1. **c** Quantification of PI-positive PBMCs treated as in **b**. **d** Volcano plot for differentially expressed genes in U937 cells infected with WT BCG or *ptpA*-deleted BCG ( $\Delta ptpA$ ) strain. The red plot represents up-regulated genes (fold change  $\geq 0.25$  and *p* value  $< 0.05$ ), and the blue plot represents down-regulated genes (fold change  $\leq -0.25$  and *p* value  $< 0.05$ ). **e** The list of the top 10 enriched gene sets. **f** GSEA plot for glutathione metabolism-related gene sets in U937 cells infected with WT BCG or BCG  $\Delta ptpA$  strain. NES, normalized enrichment score. **g** The flow diagram of glutathione metabolism processes in the schema chart. GCL, glutamate cysteine ligase; GS, GSH synthetase; GSTs, glutathione S-transferases; GPX, glutathione peroxidase; GR, glutathione reductase. **h** The gating strategy of flow cytometry. **i** Immunoblot analysis of GPX4 and  $\alpha$ -Tubulin in U937 cells. Cells were uninfected or infected with WT Mtb, Mtb  $\Delta ptpA$ , or Mtb  $\Delta ptpA:ptpA$  strain at an MOI of 10 for 24 h with or without DOX (1  $\mu$ M) treatment. Error bars are means  $\pm$  SD of three groups. Statistical significance was determined using two-way ANOVA (Tukey's multiple comparisons test).



**Supplementary Figure 3. PtpA enters host cell nucleus through binding to RanGDP. a**

Confocal microscopic analysis of the co-localization of PtpA or p53 (a positive control) with host cell nucleus. A549 cells were treated with vehicle or 25  $\mu$ M ivermectin for 4 h. Flag-tagged proteins (green) were stained with anti-Flag antibody, and nuclei (blue) were stained with DAPI. Scale bars, 10  $\mu$ m. **b** The interaction assay between PtpA and Ran GTPase using yeast two-hybrid system. The transformants were plated onto low-stringency (left) and high-stringency (right) selection plates, respectively. **c** Multiple sequence alignment of PtpA from Mtb, *Mycobacterium terrae*, *Mycobacterium marinum*, *Mycobacterium lepromatosis*, *Bifidobacterium bifidum*, and *Staphylococcus aureus*, using ESPript 3.0 server (<https://espript.ibcp.fr/ESPript/cgi-bin/ESPript.cgi>). Conserved residues and conserved hydrophobic residues are marked with red background and asterisk, respectively. **d** Survival of Mtb strains in U937 cells. Cells were uninfected or infected with WT Mtb, Mtb  $\Delta$ *ptpA*, Mtb  $\Delta$ *ptpA*:*ptpA*, Mtb  $\Delta$ *ptpA*:*ptpA*<sup>C11A</sup>, or Mtb  $\Delta$ *ptpA*:*ptpA*<sup>D126A</sup> strain at an MOI of 10 for 24 h with the treatment of vehicle or 10  $\mu$ M Fer-1. Error bars are means  $\pm$  SD of three groups. Statistical significance was determined using two-way ANOVA (Tukey's multiple comparisons test).

# Supplementary Figure 4

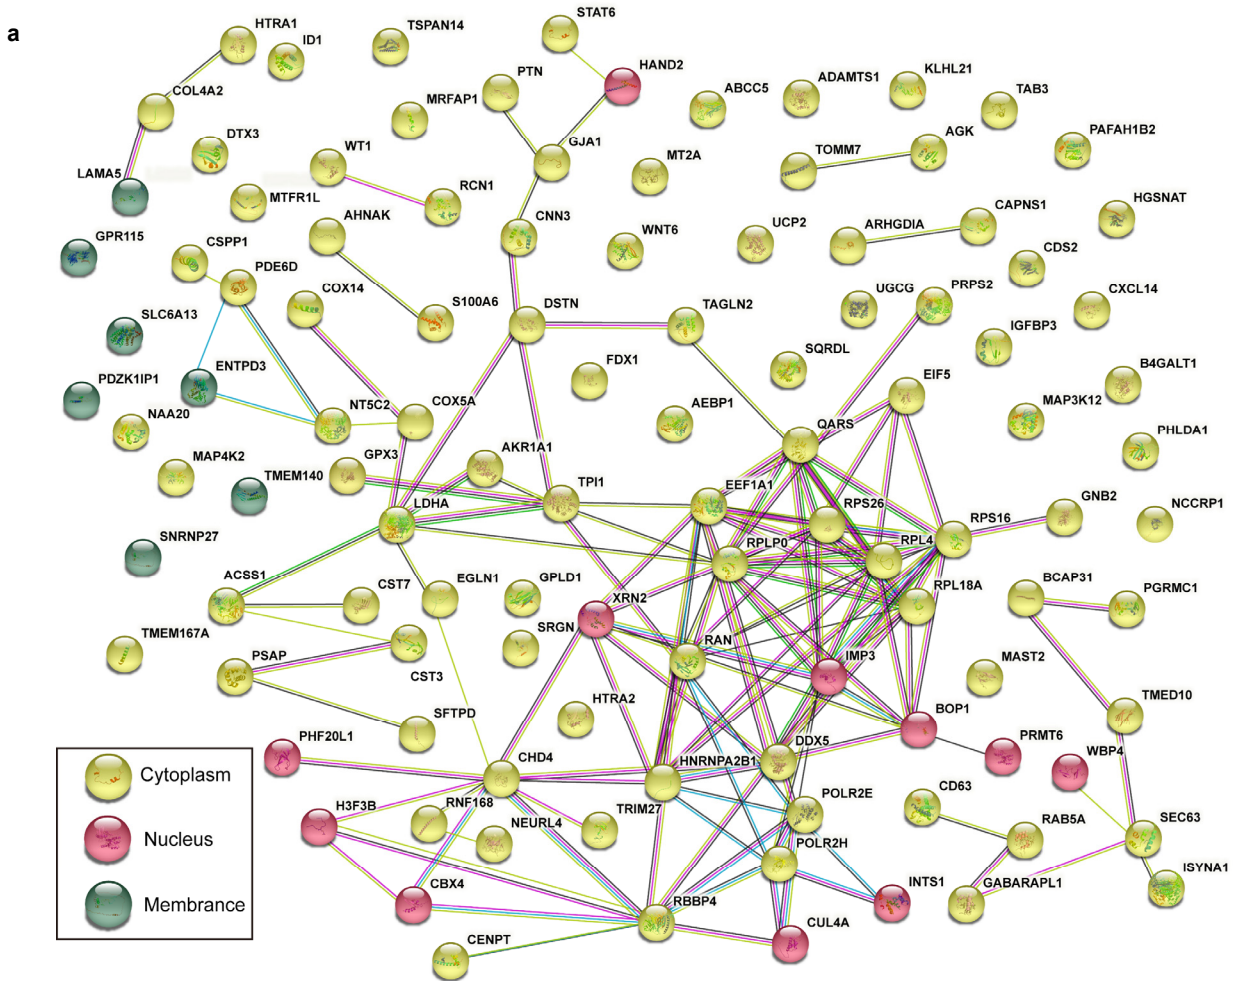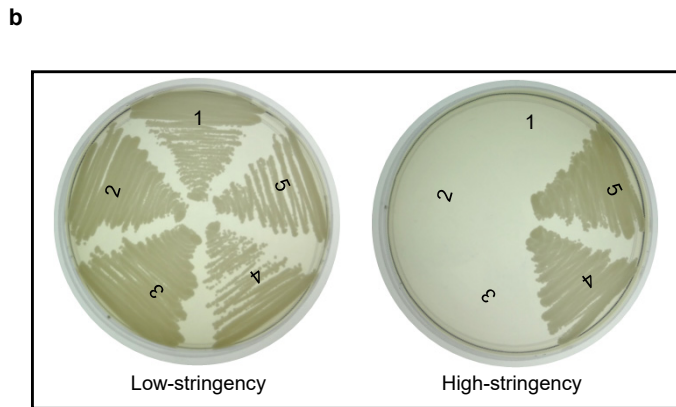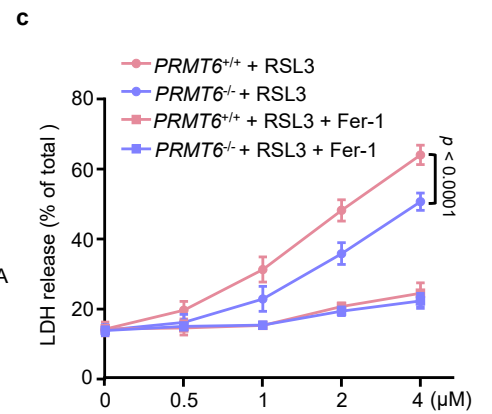



**Supplementary Figure 4. Mtb PtpA interacts with PRMT6.** **a** Protein-protein interaction network of PtpA-interacting host proteins screened by yeast two-hybrid system. The interaction overlap and subcellular localization of PtpA-interacting host proteins were predicted using STRING (<https://string-db.org>). **b** The interaction assay between PtpA and PRMT6 using yeast two-hybrid system. The transformants were plated onto low-stringency (left) and high-stringency (right) selection plates, respectively. **c** LDH release of *PRMT6*<sup>+/+</sup> and *PRMT6*<sup>-/-</sup> U937 cells untreated or treated with 0.5, 1, 2, or 4  $\mu$ M RSL3 for 8 h, in the presence or absence of 10  $\mu$ M Fer-1. Error bars are means  $\pm$  SD of three groups. Statistical significance was determined using two-way ANOVA (Tukey's multiple comparisons test).

## Supplementary Figure 5

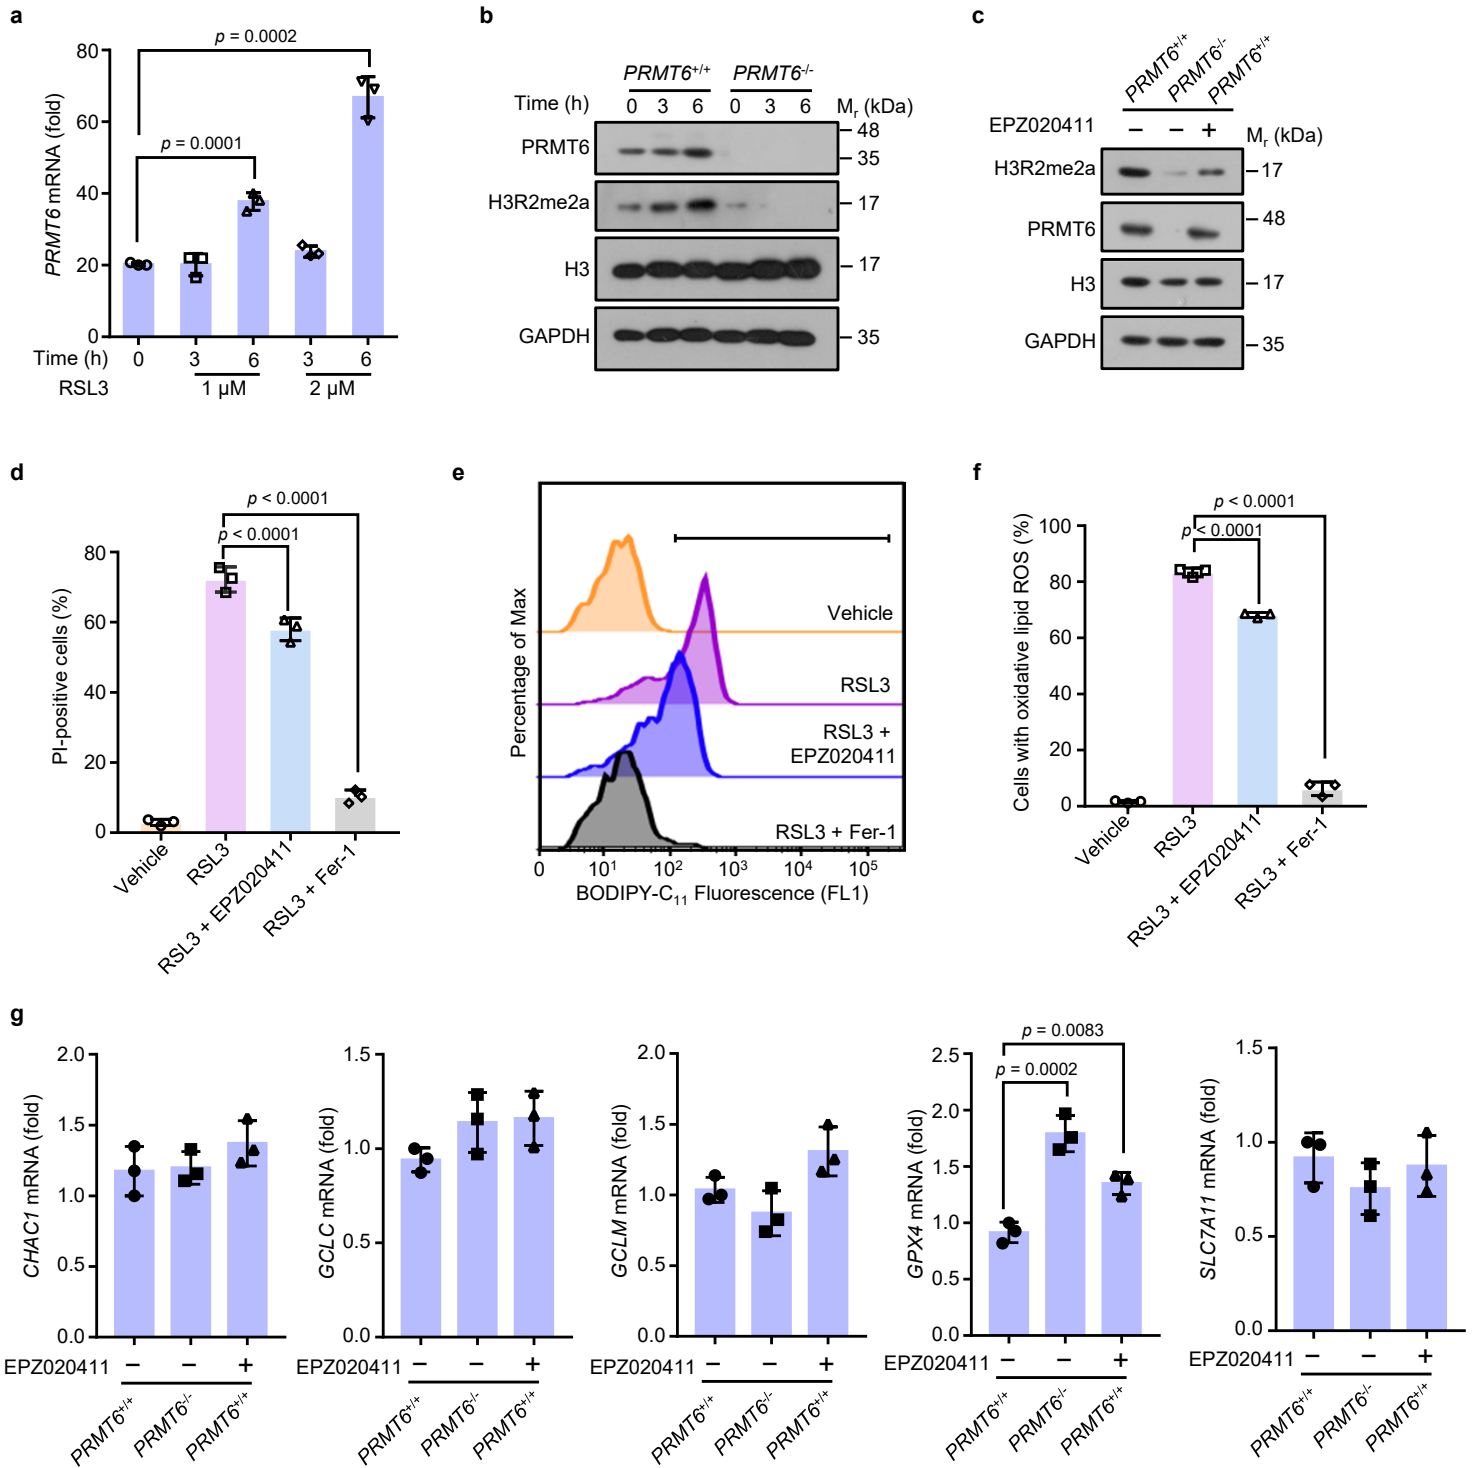

**Supplementary Figure 5. PRMT6 is involved in ferroptosis regulation depending on its methyltransferase activity.** **a** RT-qPCR analysis of *PRMT6* mRNA in U937 cells. Cells were untreated or treated with 1 or 2  $\mu$ M RSL3 for 3 h or 6 h. **b** Immunoblot analysis of PRMT6, H3R2me2a, H3, and GAPDH in *PRMT6*<sup>+/+</sup> and *PRMT6*<sup>-/-</sup> U937 cells. Cells were treated with 2  $\mu$ M RSL3 for 0 h, 3 h, or 6 h. **c** Immunoblot analysis of H3R2me2a, PRMT6, H3, and GAPDH in *PRMT6*<sup>+/+</sup> U937 cells, *PRMT6*<sup>-/-</sup> U937 cells, and *PRMT6*<sup>+/+</sup> U937 cells treated with 10  $\mu$ M EPZ020411 for 24 h. **d** Quantification of PI-positive U937 cells. Cells were divided into four groups: vehicle, RSL3, RSL3 + EPZ020411, and RSL3 + Fer-1. For vehicle, RSL3, and RSL3 + Fer-1 groups, U937 cells were treated with vehicle, 2  $\mu$ M RSL3, or 2  $\mu$ M RSL3 plus 10  $\mu$ M Fer-1 for 8 h. For RSL3 + EPZ020411 group, U937 cells were treated with 10  $\mu$ M EPZ020411 for 24 h and with RSL3 for additional 8 h. **e** Flow cytometry analysis of U937 cells with oxidative lipid ROS. Cells were treated as in **d**, and marked with BODIPY C<sub>11</sub> lipid probe. **f** Quantification of U937 cells with oxidative lipid ROS. Cells were treated as in **e**. **g** RT-qPCR analysis of *CHAC1* mRNA, *GCLC* mRNA, *GCLM* mRNA, *GPX4* mRNA, and *SLC7A11* mRNA in *PRMT6*<sup>+/+</sup> U937, *PRMT6*<sup>-/-</sup> U937, and *PRMT6*<sup>+/+</sup> U937 cells treated with 10  $\mu$ M EPZ020411 for 24 h. Error bars are means  $\pm$  SD of three groups. Statistical significance was determined using one-way ANOVA (Dunnett's multiple comparisons test).

# Supplementary Figure 6

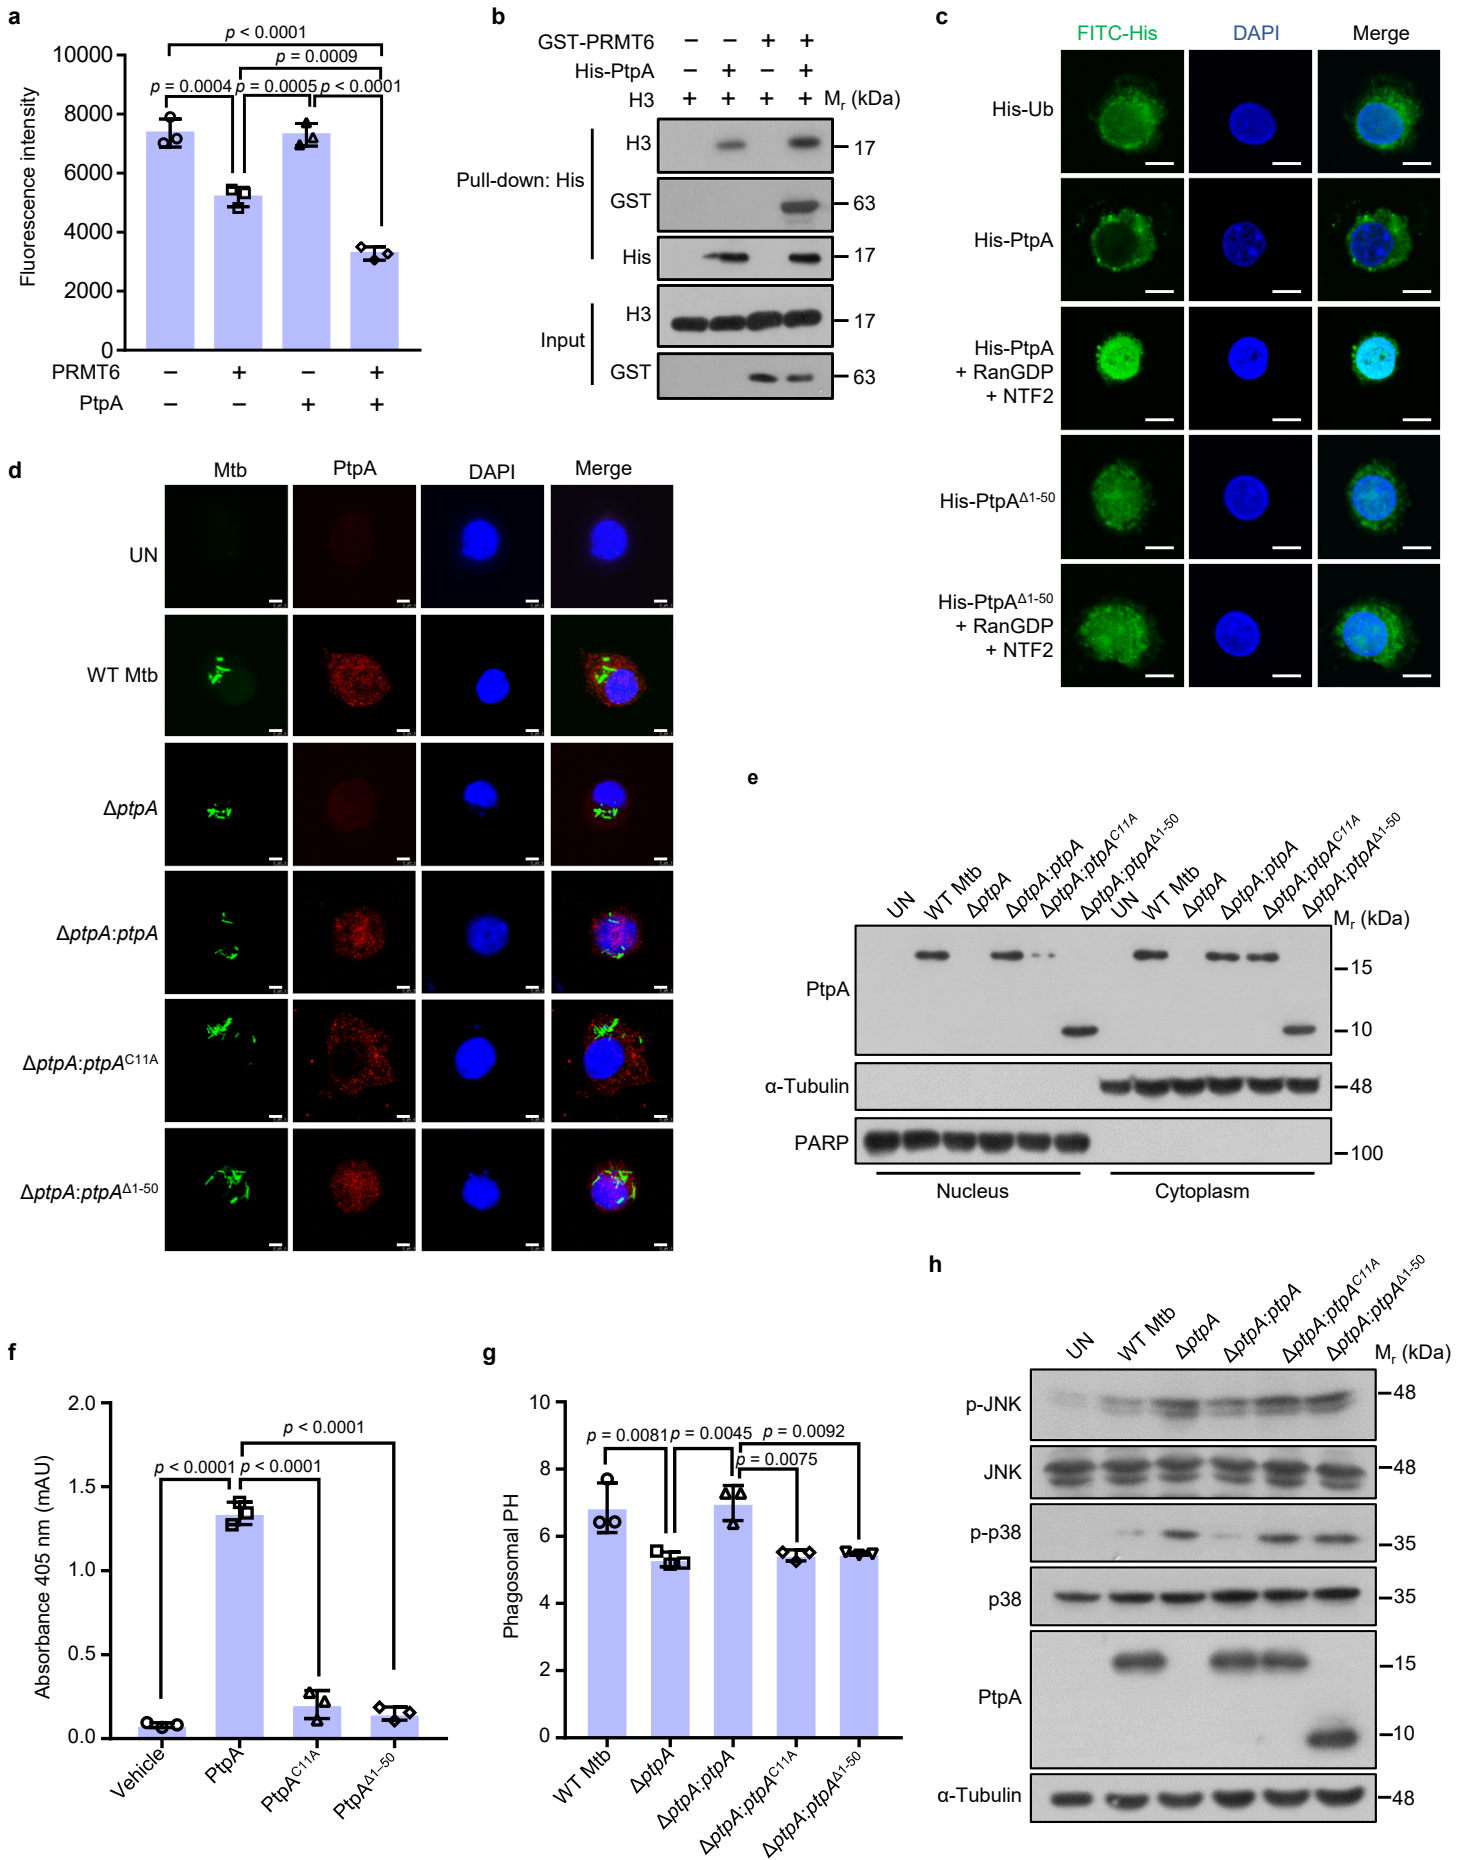

**Supplementary Figure 6. Mtb PtpA enhances the methyltransferase activity of PRMT6.**

**a** Fluorescence intensity of Bz-Arg-AMC in the presence of PRMT6, PtpA, or PRMT6 plus PtpA. **b** Pull-down assay of H3 and GST-PRMT6 by His-PtpA. **c** Confocal microscopic analysis of protein nuclear localization using digitonin-treated semipermeable U937 cells. Cells were incubated with His-Ub, His-PtpA, or His-PtpA<sup>Δ1-50</sup> with or without GST-RanGDP and GST-NTF2. His-tagged proteins (green) were stained with anti-His antibody, and nuclei (blue) were stained with DAPI. Scale bar, 5 μm. **d** Confocal microscopic analysis for nuclear localization of PtpA, PtpA<sup>C11A</sup>, or ptpA<sup>Δ1-50</sup> in U937 cells. Cells were uninfected or infected with WT Mtb, Mtb  $\Delta$ *ptpA*, Mtb  $\Delta$ *ptpA:ptpA*, Mtb  $\Delta$ *ptpA:ptpA*<sup>C11A</sup>, or Mtb  $\Delta$ *ptpA:ptpA*<sup>Δ1-50</sup> strain at an MOI of 10 for 8 h. Mtb strains were stained with Alexa Fluor 488 succinimidyl ester, PtpA or its mutants (red) were stained with anti-PtpA antibody, and nuclei (blue) were stained with DAPI. Scale bar, 5 μm. **e** Immunoblot analysis of the cytosolic fraction and the pellets containing the nuclei in U937 cells. Cells were uninfected or infected with WT Mtb, Mtb  $\Delta$ *ptpA*, Mtb  $\Delta$ *ptpA:ptpA*, Mtb  $\Delta$ *ptpA:ptpA*<sup>C11A</sup>, or Mtb  $\Delta$ *ptpA:ptpA*<sup>Δ1-50</sup> strain at an MOI of 20 for 8 h. **f** Phosphatase activity of PtpA, PtpA<sup>C11A</sup>, and PtpA<sup>Δ1-50</sup> analyzed by para-nitrophenyl phosphate (pNPP) phosphatase assay. **g** Phagosomal pH of the infected U937 cells was measured with fluorescence activated cell sorting (FACS). WT Mtb, Mtb  $\Delta$ *ptpA*, Mtb  $\Delta$ *ptpA:ptpA*, Mtb  $\Delta$ *ptpA:ptpA*<sup>C11A</sup>, or Mtb  $\Delta$ *ptpA:ptpA*<sup>Δ1-50</sup> strain were labeled with pH-sensitive fluorescent dye (pHrodo) and used to infect U937 cells at an MOI of 10 for 4 h. **h** Immunoblot analysis of p-JNK, JNK, p-p38, p38, PtpA, and α-Tubulin in U937 cells infected with the indicated Mtb strains for 4 h as in e. Error bars are means ± SD of three groups. Statistical significance was determined using one-way ANOVA (Dunnett's multiple comparisons test).

# Supplementary Figure 7

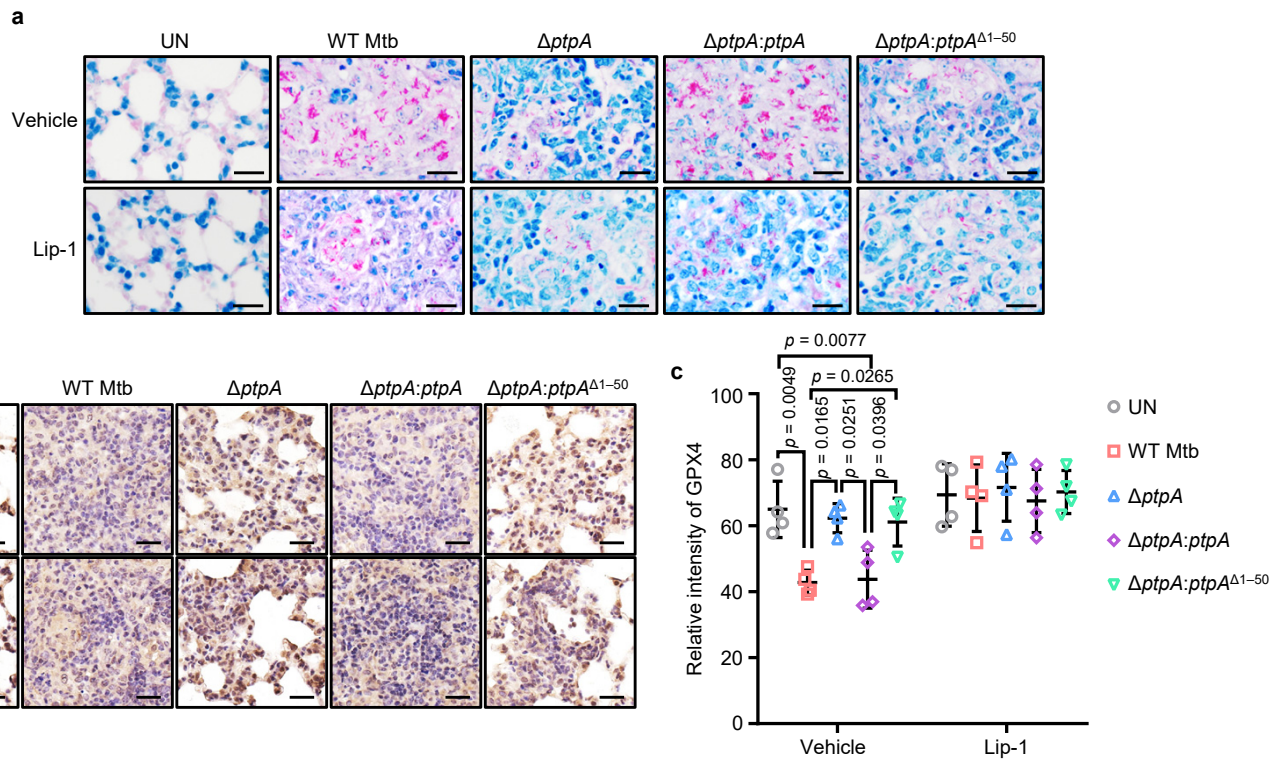

**Supplementary Figure 7. Lip-1 treatment reduces bacteria burden and promotes GPX4 expression in mice.** **a** Acid-fast staining of lung sections from mice infected with WT Mtb, Mtb  $\Delta ptpA$ , Mtb  $\Delta ptpA:ptpA$ , or Mtb  $\Delta ptpA:ptpA^{\Delta 1-50}$  strain for 5 weeks. Uninfected mice were served as the control. Daily intraperitoneal injections of vehicle or Lip-1 (3 mg/kg) were administered to uninfected or infected mice from day 15 after Mtb infection (n = 4). Scale bars, 20  $\mu$ m. **b** Immunohistochemical staining of GPX4 in lung sections from mice as in **a**. Scale bars, 20  $\mu$ m. **c** Quantitative analysis of GPX4 expression in lungs from mice as in **a**. Error bars are means  $\pm$  SD of four mice per group and each represents data from two separate experiments. Statistical significance was determined using two-way ANOVA (Tukey's multiple comparisons test).

Supplementary Figure 8

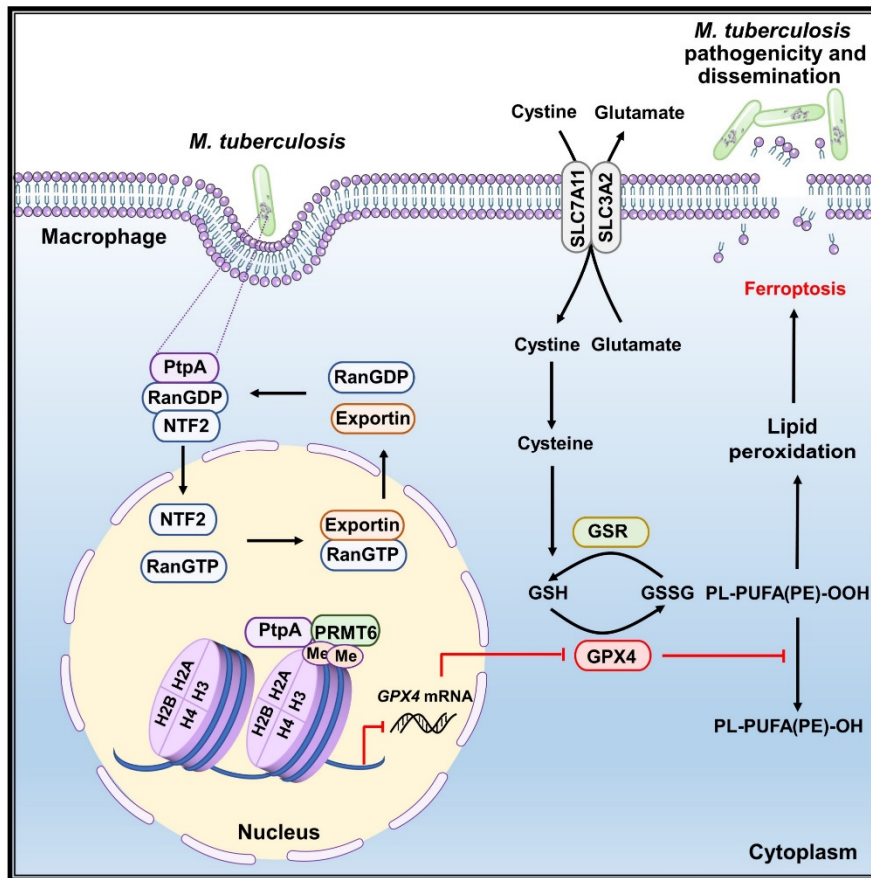



**Supplementary Figure 8. Schematic model shows that nuclear PtpA enhances PRMT6-mediated H3R2me2a to promote ferroptosis-dependent pathogen pathogenicity and dissemination.** Briefly, Mtb effector PtpA enters host cell nucleus to enhance PRMT6-mediated asymmetric demethylation of H3R2, leading to the inhibition of GPX4 expression, followed by promoting ferroptosis-dependent pathogen pathogenicity and dissemination.
