# Supplementary material for: A mycobacterial effector promotes ferroptosis-dependent pathogenicity and dissemination
Source: PubMed Central journal article supplement (PMC10023711; doi:10.1038/s41467-023-37148-x), 2023-03-17
Supplement: 41467_2023_37148_MOESM3_ESM.pdf [file 41467_2023_37148_MOESM3_ESM.pdf]

## **Description of Additional Supplementary Files**

**Supplementary Data 1.** Plasmids and oligonucleotides. Lists of the names, descriptions, and sources of plasmids and oligonucleotides used in this study.

**Supplementary Movie 1.** Cell viability of WT U937 cells treated with RSL3. Cells were treated with 2  $\mu$ M RSL3 and were then incubated with 5  $\mu$ g/mL propidium iodide (PI). Images were acquired in 5 min intervals over a time frame of 6 h. Dead cells (red) were stained with PI. Scale bars, 25  $\mu$ m.

**Supplementary Movie 2.** Cell viability of U937 cells stably expressing PtpA treated with RSL3. Cells were treated with 2  $\mu$ M RSL3 and were then incubated with 5  $\mu$ g/mL PI. Images were acquired in 5 min intervals over a time frame of 6 h. Dead cells (red) were stained with PI. Scale bars, 25  $\mu$ m.
